# Supplementary material
Source: publisher figshare collection journal article supplement (https://gsajournals.figshare.com/articles/dataset/_/8343830)
Supplement: Supplementary file 1 [file 1]

Archive with 7 entries (7 files):
- FigureS1.pdf
- FigureS2.png
- FigureS3.png
- FigureS4.pdf
- FigureS5.pdf
- FigureS6.pdf
- FigureS7.png
