# Supplementary material
Source: publisher figshare collection journal article supplement (https://gsajournals.figshare.com/articles/dataset/_/8343830)

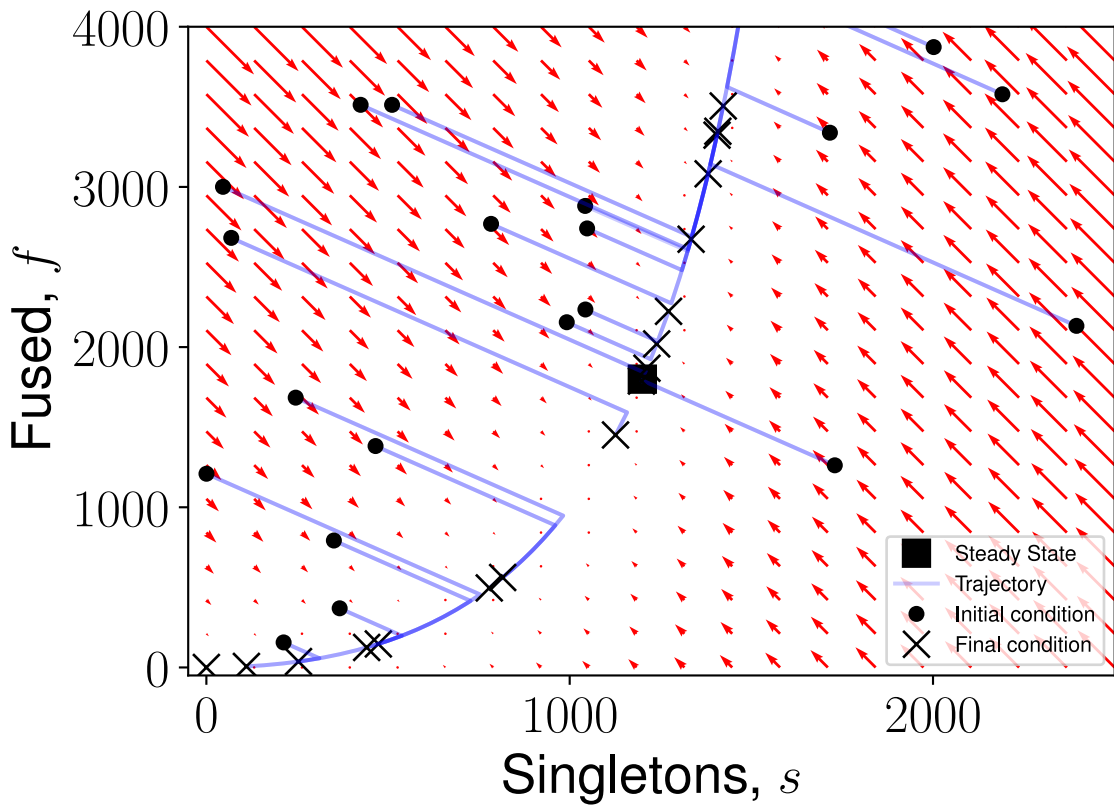

Supplement: Supplementary file 1 [file 1 › FigureS1.pdf]

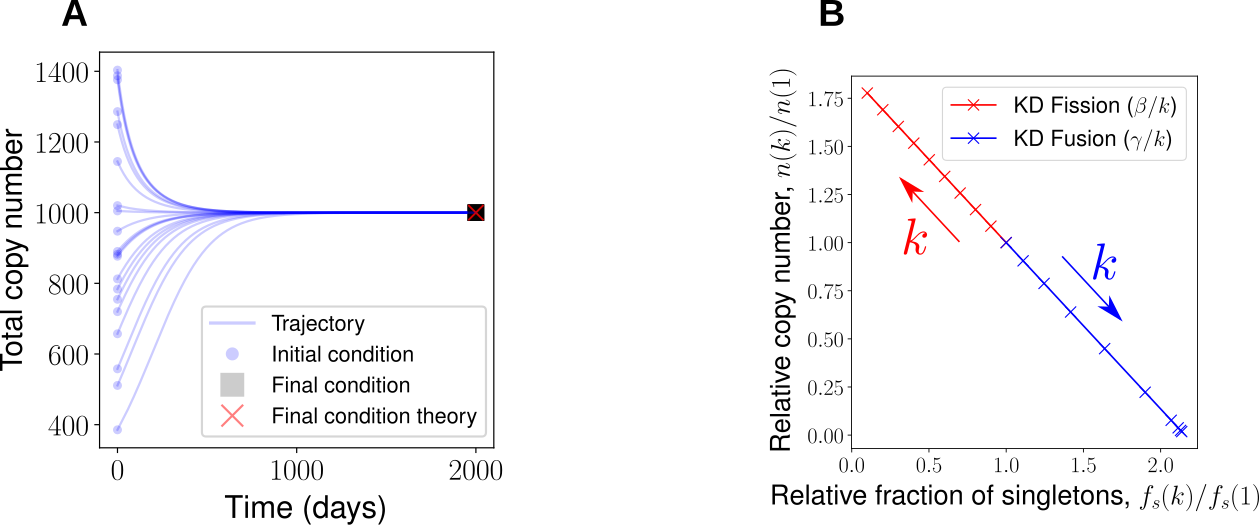

Supplement: Supplementary file 1 [file 1 › FigureS2.png]

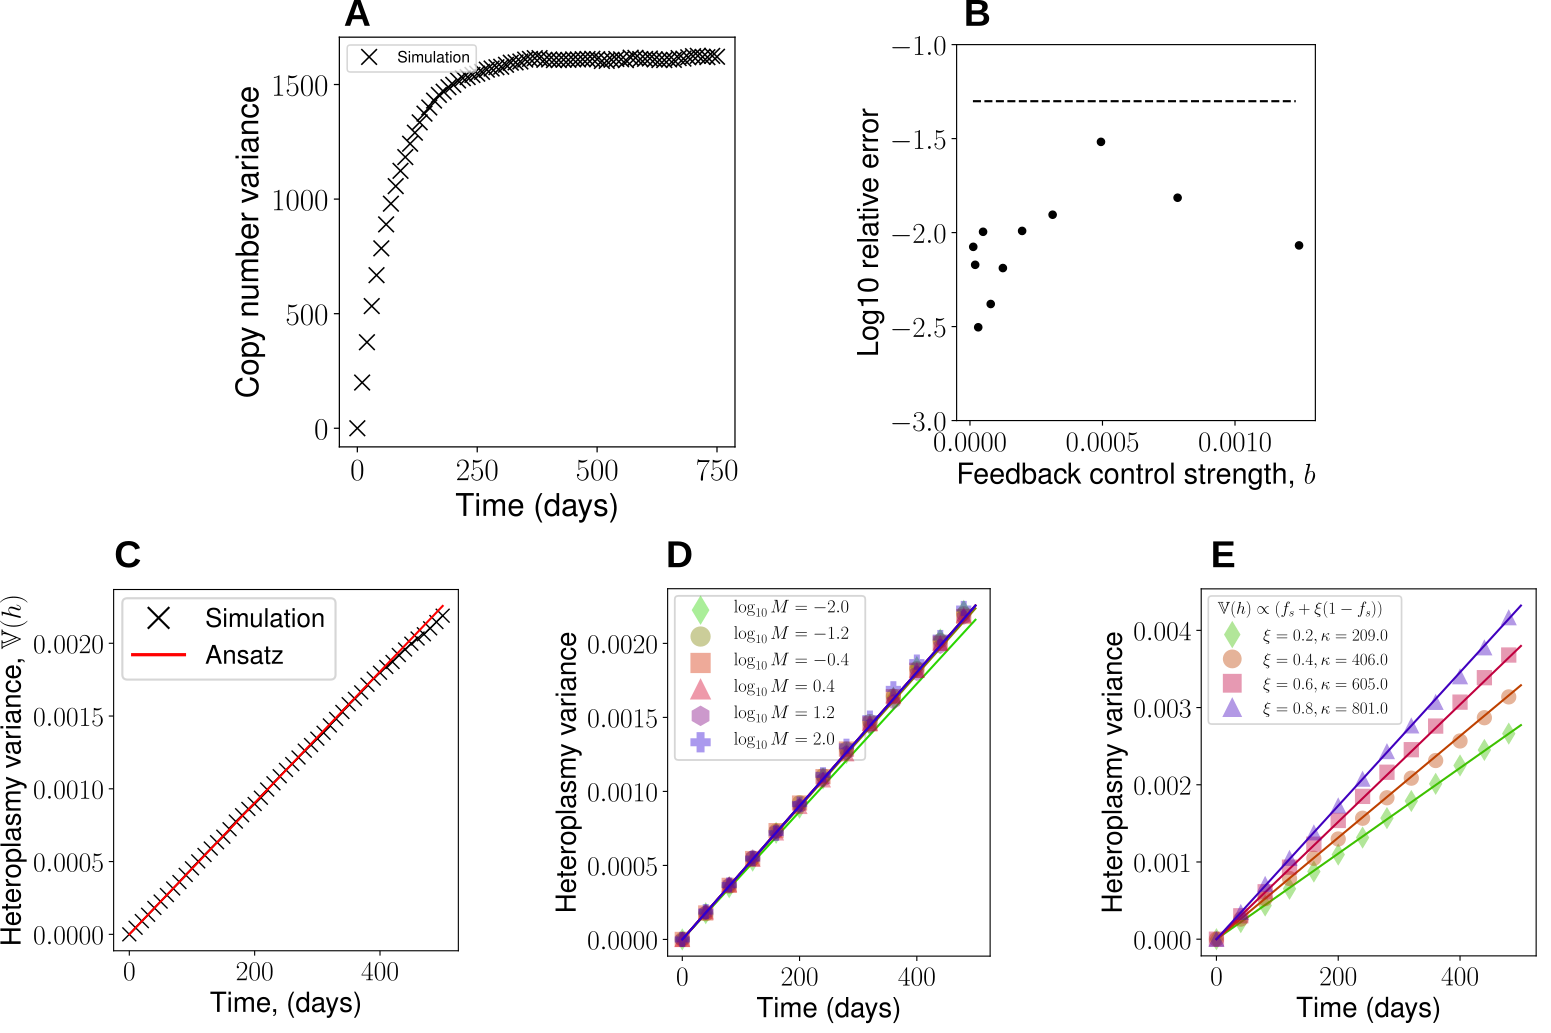

Supplement: Supplementary file 1 [file 1 › FigureS3.png]

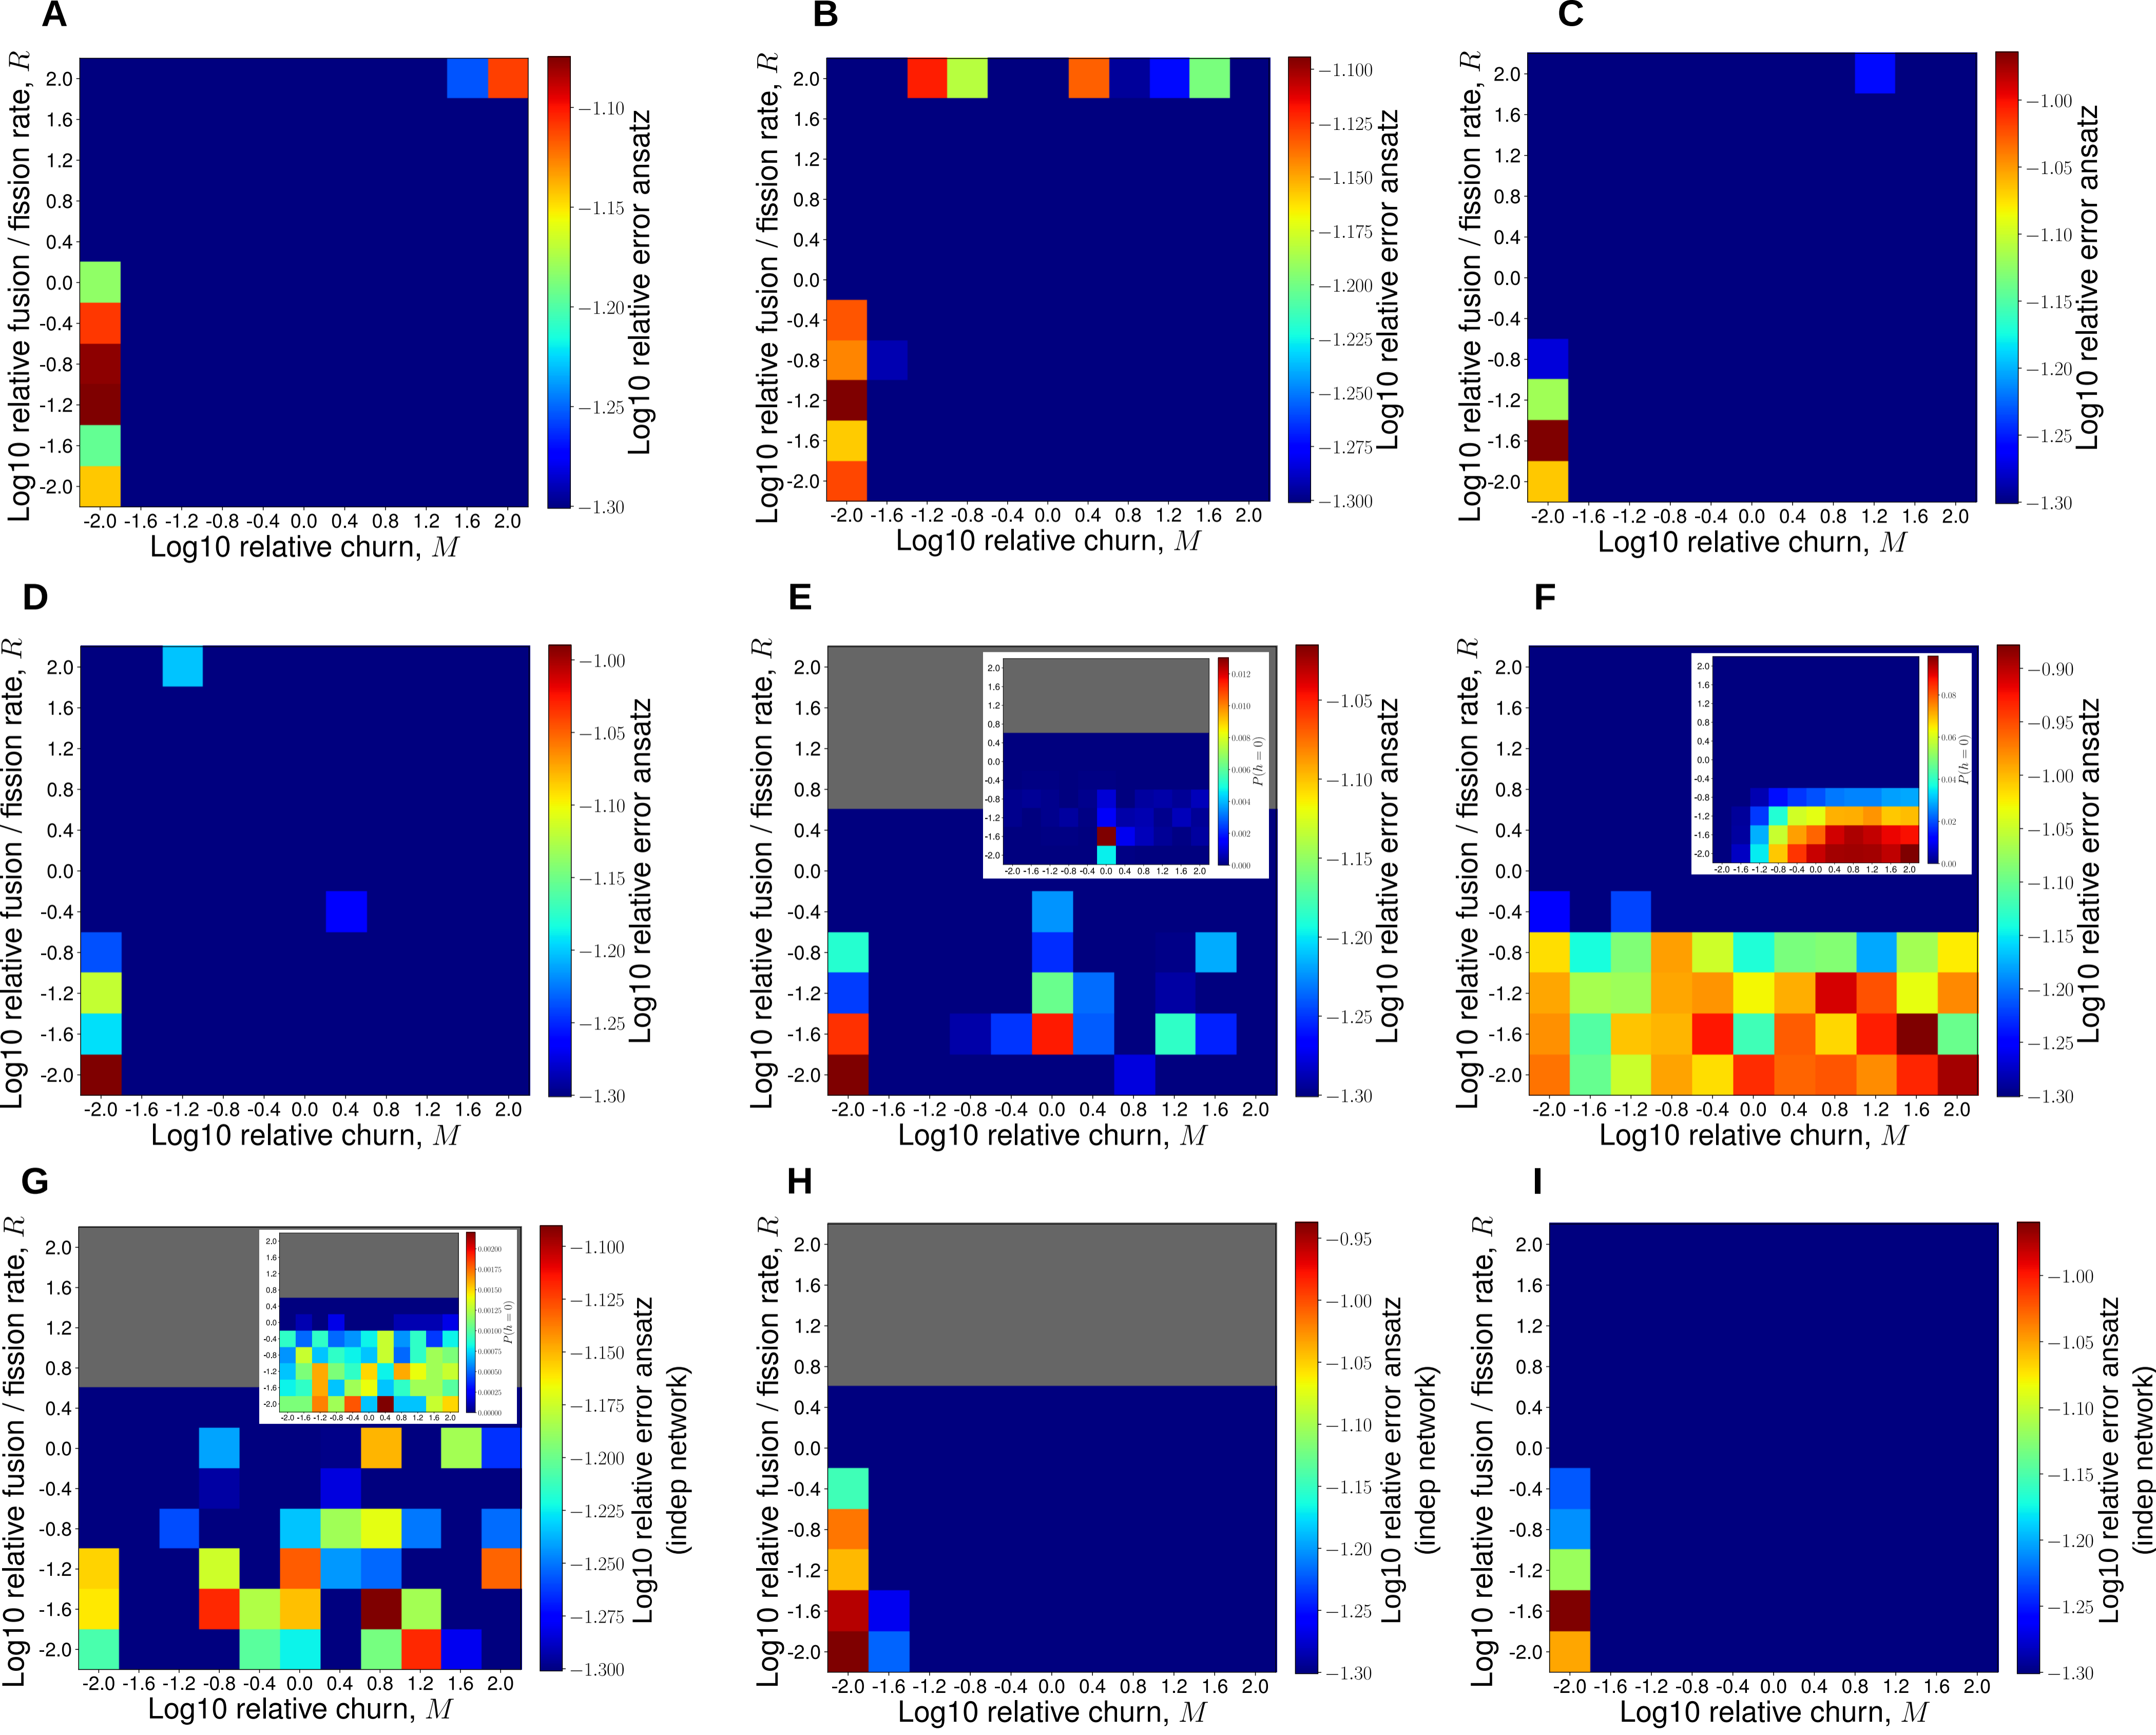

Supplement: Supplementary file 1 [file 1 › FigureS4.pdf]

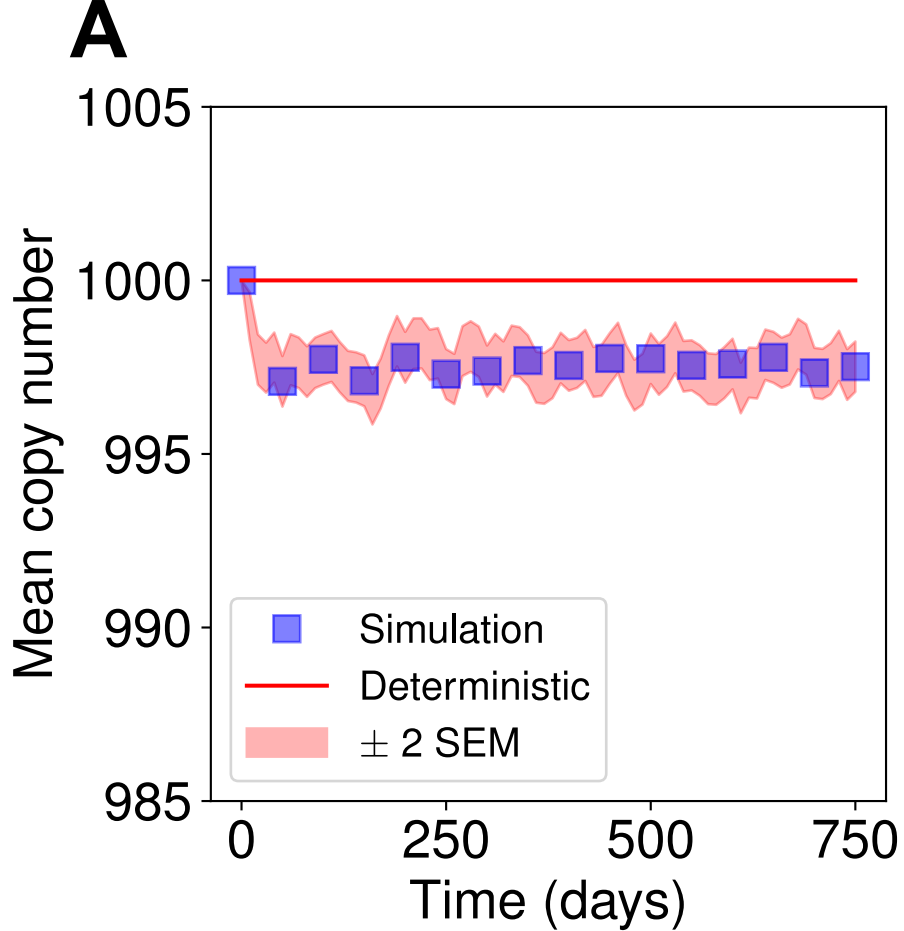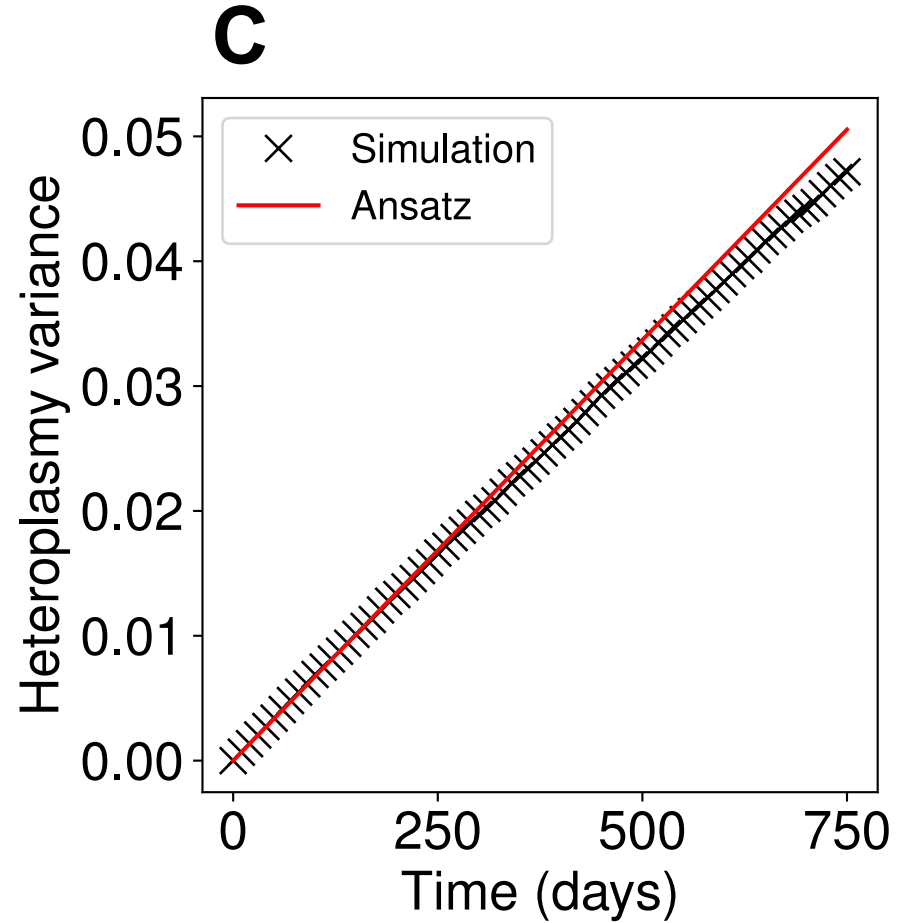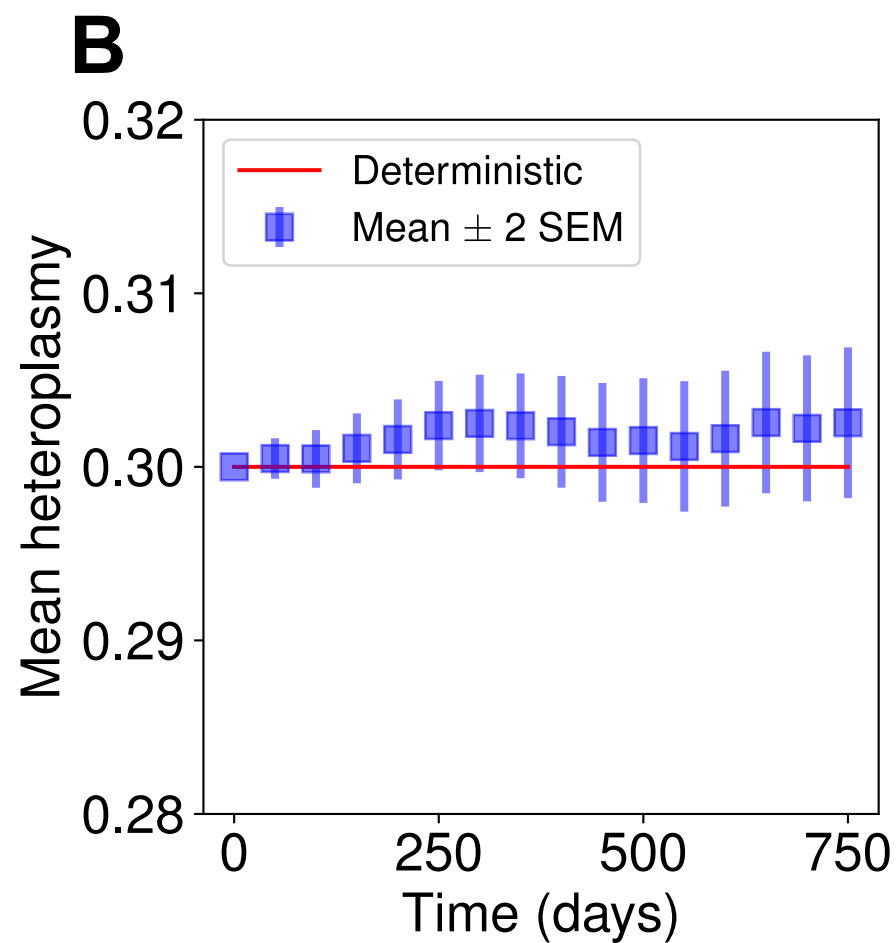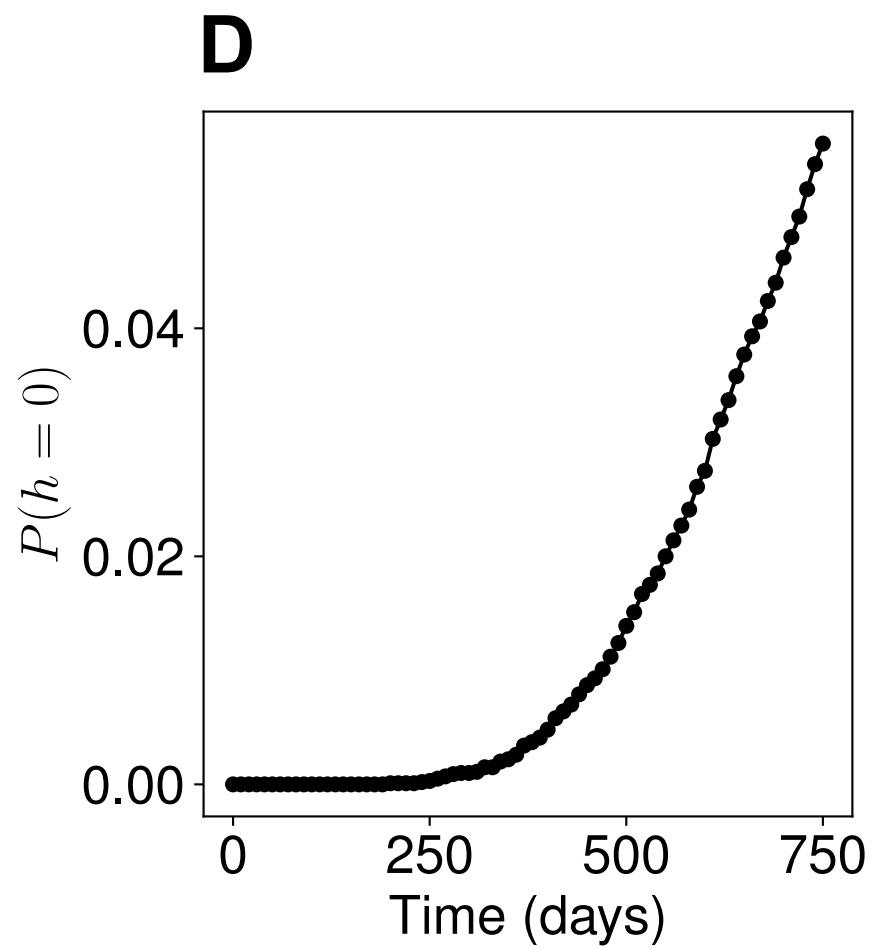

Supplement: Supplementary file 1 [file 1 › FigureS5.pdf]

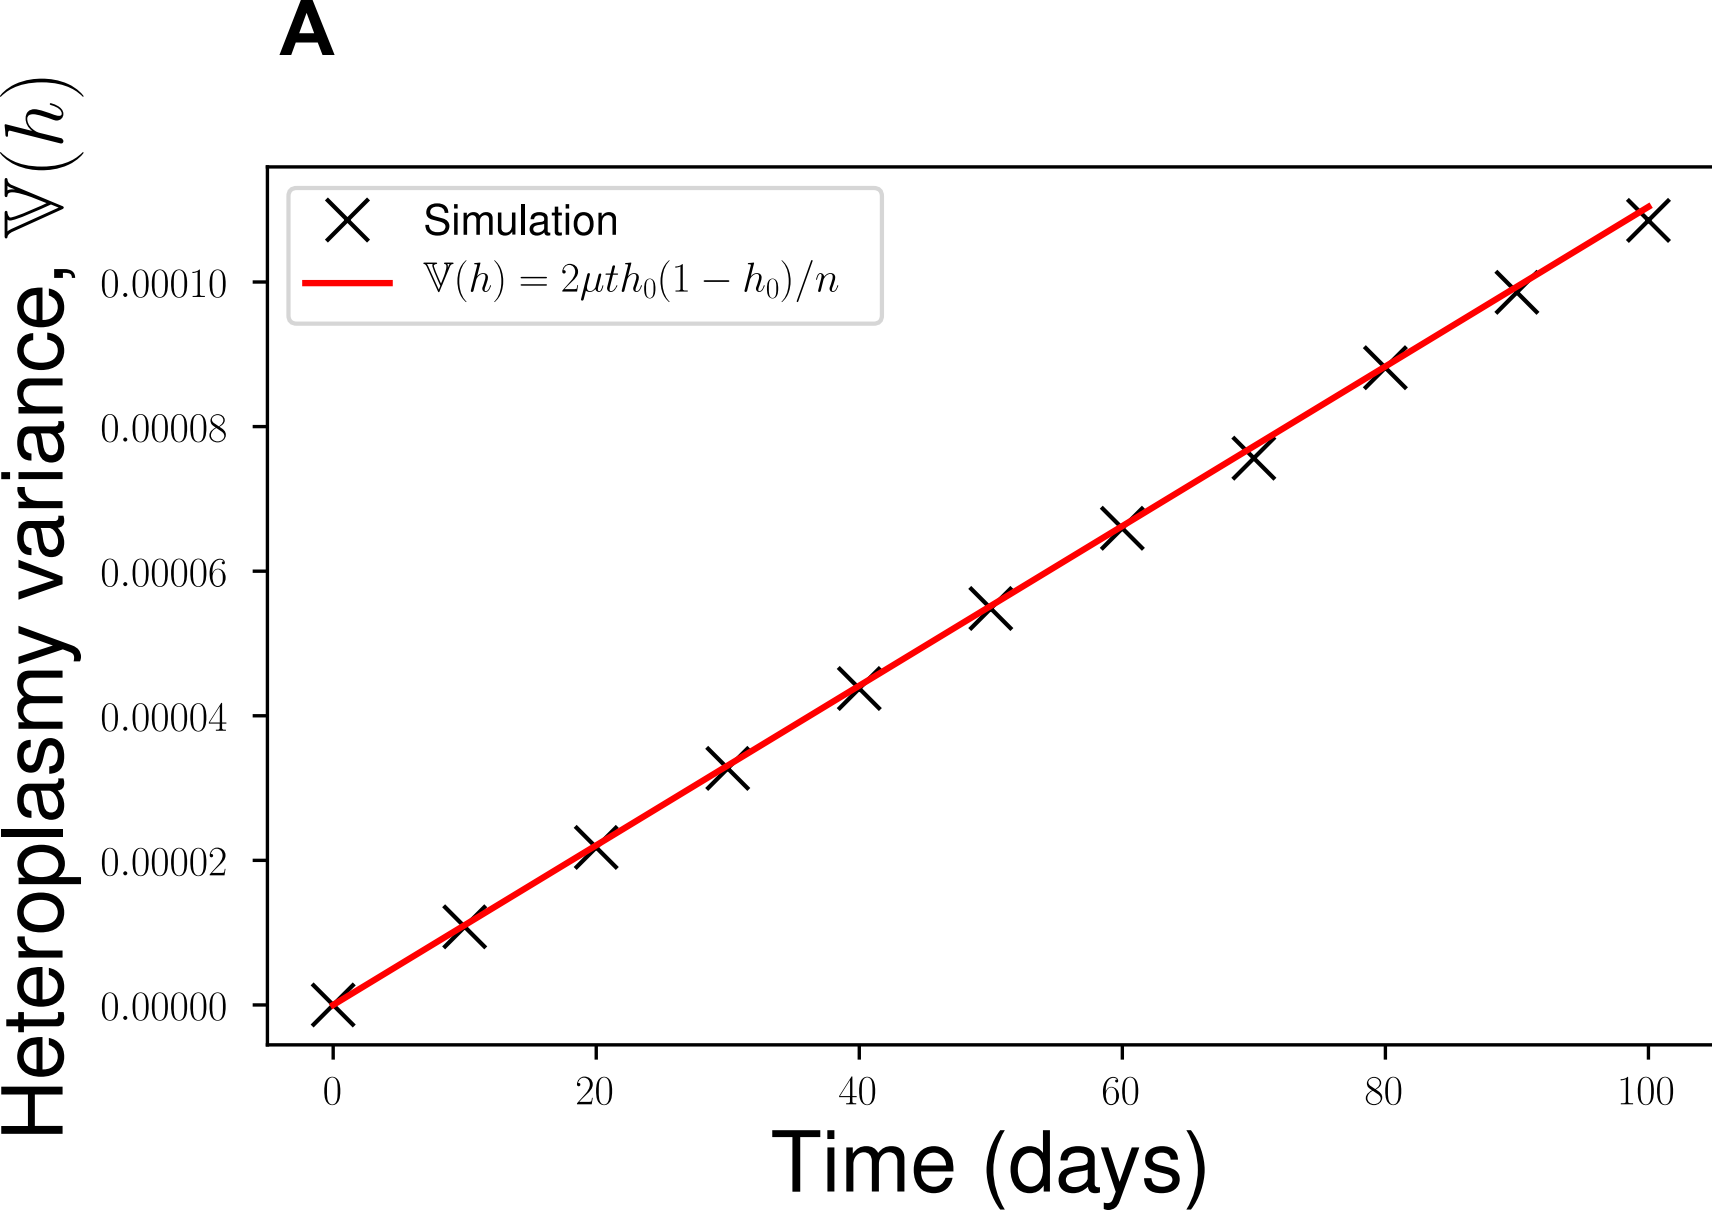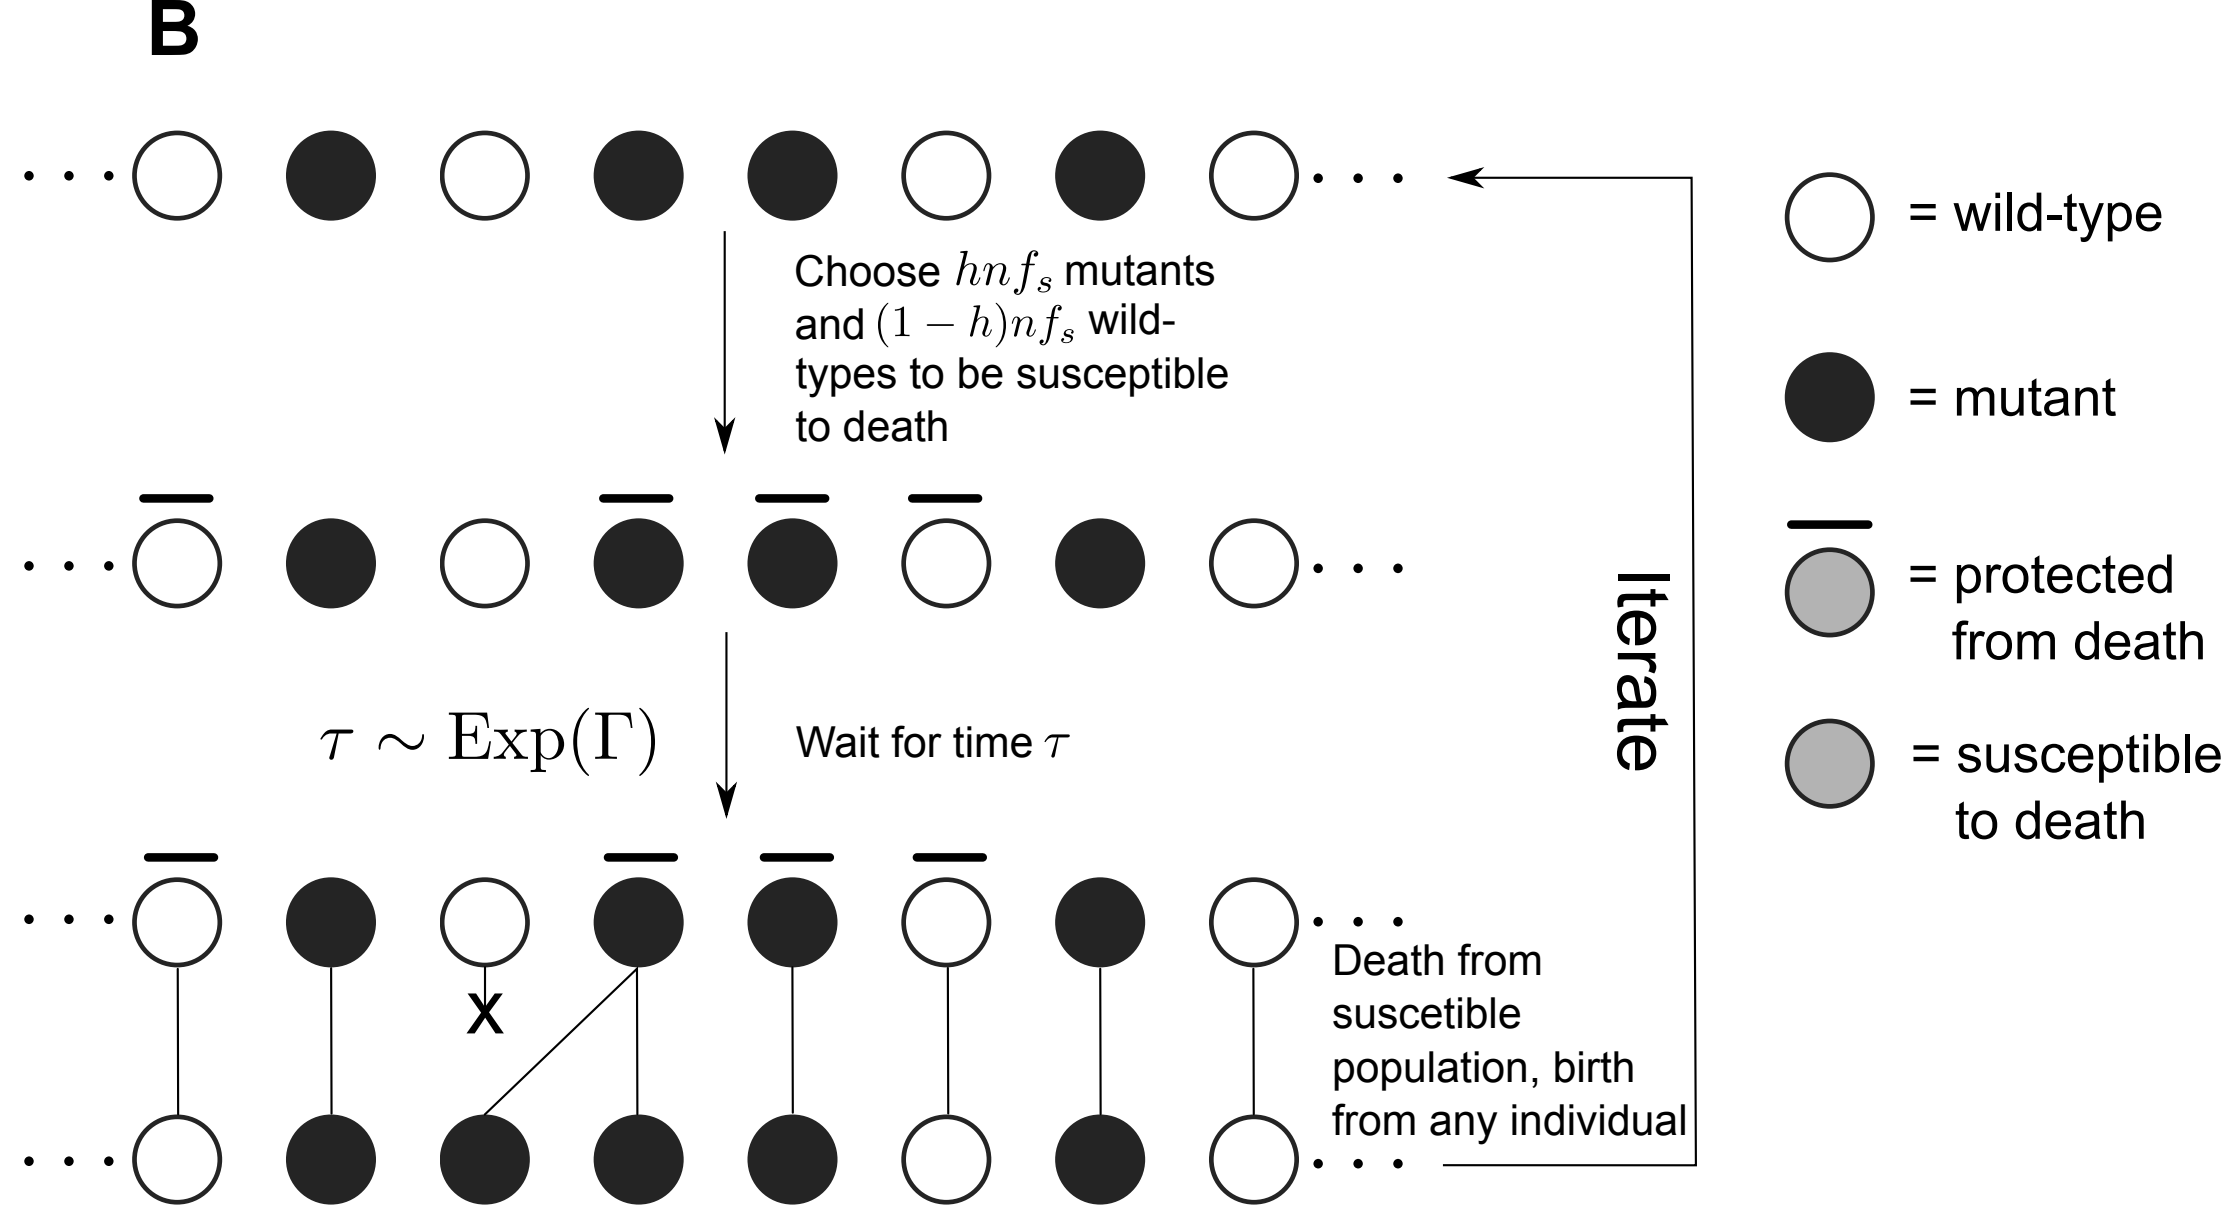

Supplement: Supplementary file 1 [file 1 › FigureS6.pdf]

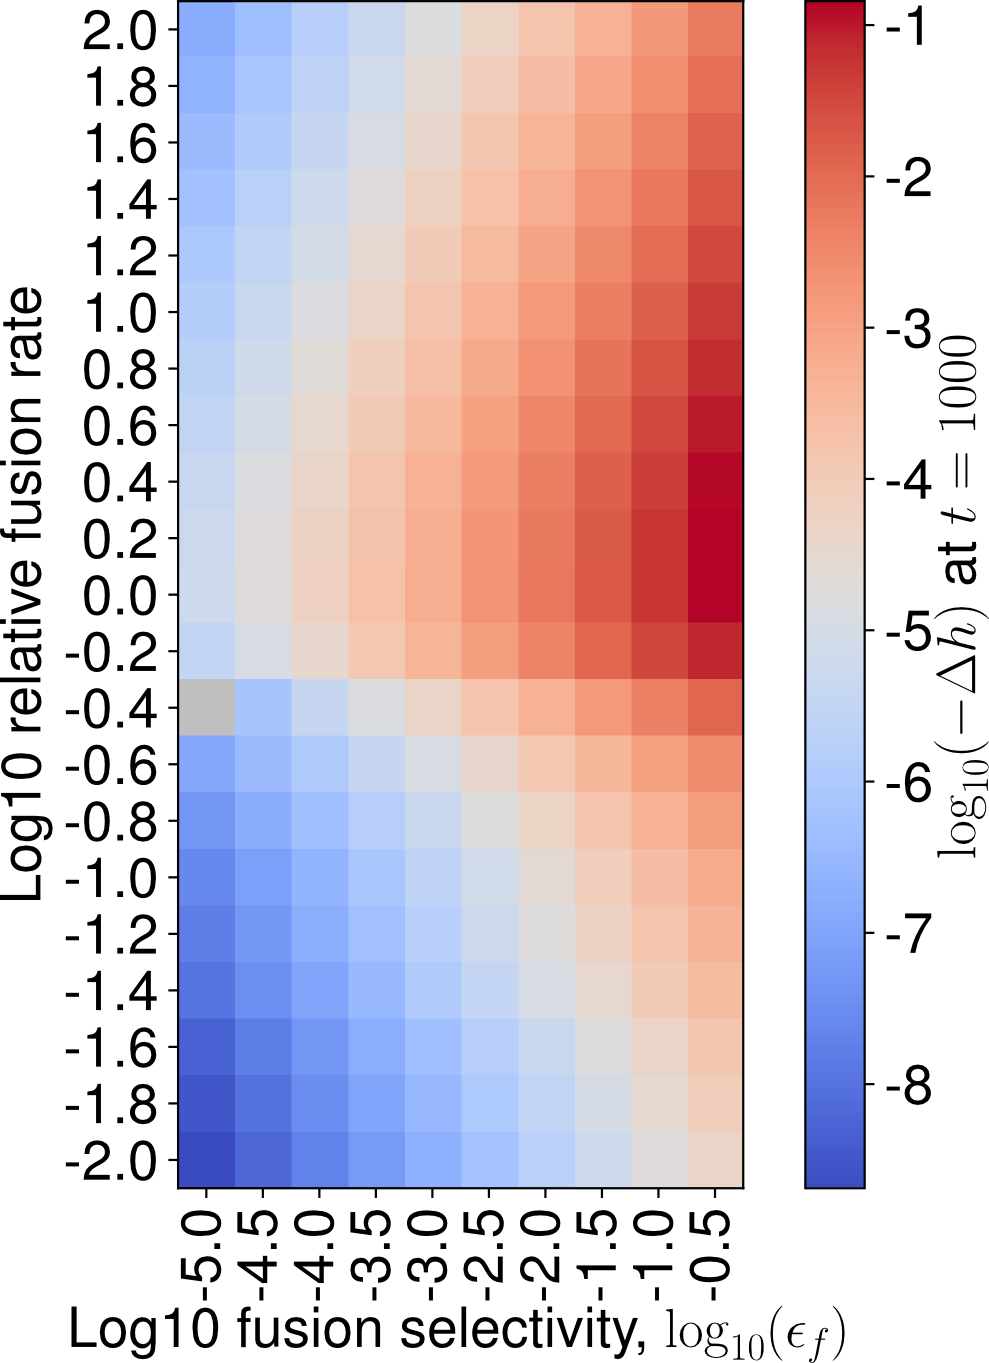

Supplement: Supplementary file 1 [file 1 › FigureS7.png]
